# Supplementary material
Source: publisher figshare collection journal article supplement (https://gsajournals.figshare.com/ndownloader/files/22012431)
Supplement: Supplementary file 1 [file 22012431]

## Sheet: Sheet1
Data type	Experimental species	Symbol/name used in publication	Source – public	Source – published	Source – unpublished	Identifiers	New reagent	Comments
Data type (mandatory) Duplicate rows as needed. Order is flexible, but row titles must be preserved.	Experimental species (mandatory, "NA" okay)	Symbol/name used in publication (mandatory)	Source – public [stock center; company, data repository] (one of D,E,F mandatory)	Source -- published [PMID or 'this paper'] (one of D,E,F mandatory)	Source – unpublished [description, incl. lab of origin] (one of D,E,F mandatory)	Identifiers [format as ID_source:identifier] Separate multiple entries with semi-colon, space	New reagent (mandatory for new entities) Description, progenitor(s)	Comments (optional) Genotypes, purpose of reagent, additional information
strain, strain_background	Drosophila melanogaster	yw, WT		29436367				rDNA SNPs 1-4 between X and Y
strain, strain_background	Drosophila melanogaster	Oregon-R	FlyBase ID: FBsn0000276					X rDNA SNP/sequence differences search, ITS+
strain, strain_background	Drosophila melanogaster	Canton-S	FlyBase ID: FBsn0000274					X rDNA SNP/sequence differences search, ITS+
strain, strain_background	Drosophila melanogaster	dcr-2p[f06544]	allele from stock BDSC, BL18987					dcr-2p{f0654} , crossed into yw background for SNP in situ
strain, strain_background	Drosophila melanogaster	dcr-2L811fsx	FBal0156733					dcr-2L811fsx, crossed into yw background for SNP in situ
strain, strain_background	Drosophila melanogaster	Su(var)3-91	BDSC, BL6209					Su(var)3-91 , crossed into yw background for SNP in situ
strain, strain_background	Drosophila melanogaster	Su(var)3-92	BDSC, BL6210					Su(var)3-92 , crossed into yw background for SNP in situ
strain, strain_background	Drosophila melanogaster	piwi1	BDSC, BL43637					piwi1, crossed into yw background for SNP in situ
strain, strain_background	Drosophila melanogaster	piwi06843	BDSC, BL12225					piwi06843, crossed into yw background for SNP in situ
strain, strain_background	Drosophila melanogaster	ago3t2	BDSC, BL28269					ago3t2, crossed into yw background for SNP in situ
strain, strain_background	Drosophila melanogaster	ago3t3	BDSC, BL28270					ago3t3, crossed into yw background for SNP in situ
strain, strain_background	Drosophila melanogaster	Le Réduit	UC San Diego Stock Center, 14021-0231.53					Le Réduit, Mauritius, X rDNA SNP/sequence differences search, ITS+
strain, strain_background	Drosophila melanogaster	Guam	UC San Diego Stock Center, 14021-0231.119					Guam, USA, X rDNA SNP/sequence differences search, ITSΔ24
strain, strain_background	Drosophila melanogaster	Beijing			gift from Dr. Amanda Larracuente			Beijing 11, X rDNA SNP/sequence differences search, ITS+
strain, strain_background	Drosophila melanogaster	Pohnpei	UC San Diego Stock Center, 14021-0231.124					Pohnpei, Micronesia, X rDNA SNP/sequence differences search, ITS+
strain, strain_background	Drosophila melanogaster	C(1)DX	BDSC, BL784					Isolating Y rDNA for sequencing
strain, strain_background	Drosophila melanogaster	C(1)RM	BDSC, BL9460					X rDNA SNPs 1-4
strain, strain_background	Drosophila melanogaster	Xbb-YS	DGRC, 101070	10624581				Df(Ys)bb-/In(1)sc4Lsc8R+Tp(1;Ys)bbAM7, y1sc4sc8w+Tu1, Y rDNA SNPs 1-3, cis elements
antibody	NA	Chicken anti-Cid		29578410				Correct antigen used to produce antibody: Ac-AKRAPRPSANNSKSPNDD
antibody	NA	Goat anti-Chicken, Alexa Fluor 488	Invitrogen, A-11039					Invitrogen, Catalog #: A-11039
sequence-based reagent	NA	SNP1 for X (18S)		29436367				5’- AAAAAATACAAGTATTTAATCACATA-/Quasar 570/3’
sequence-based reagent	NA	SNP2 for X (ITS1)		29436367				5’- GTTTCTTCGATTTTCATGTTCGAAAC-/Quasar 570/3’
sequence-based reagent	NA	SNP3 for X (ITS1)		29436367				5’- AAATATTTATTAACGGTAAGGATATT-/Quasar 570/3’
sequence-based reagent	NA	SNP4 for X (28S)		29436367				5’- TTAGGCATTTTTGTTTTACTTGAAAA-/Quasar 570/3’
sequence-based reagent	NA	SNP1 for Y (18S)		29436367				5’- AAAAGATACAAGTATTTAATCACATA-/Quasar 670/3’
sequence-based reagent	NA	SNP2 for Y (ITS1)		29436367				5’- GTTTTTTCGATTTTCATGTTCGAAAC-/Quasar 670/3’
sequence-based reagent	NA	SNP3 for Y (ITS1)		29436367				5’- AAATGTTTATTAACGGTAAGGATATT-/Quasar 670/3’
sequence-based reagent	NA	SNP4 for Y (28S)		29436367				5’- TTAGCCATTTTTGTTTTACTTGAAAA-/Quasar 670/3’
sequence-based reagent	NA	SNP1 mask		29436367				5’- TATGTGATTAAATACT-3’
sequence-based reagent	NA	SNP2 mask		29436367				5’- GTTTCGAACATGAAAA-3’
sequence-based reagent	NA	SNP3 mask		29436367				5’- AATATCCTTACCGTTA-3’
sequence-based reagent	NA	SNP4 mask		29436367				5’- TTTTCAAGTAAAACAA-3’
sequence-based reagent	NA	ITSΔ24		this paper			5’-/5Cy3/-AGGTTGCCAAGCCCCATCTTCGTTTT-3’
sequence-based reagent	NA	ITS+		this paper			5’-/5Cy5/-GCCCCACACTAACTATATAAATAAAACCC-3’
sequence-based reagent	NA	18S Forward Primer		29436367				5’- GAAACGGCTACCACATCTAAGG-3’
sequence-based reagent	NA	18S Reverse Primer		29436367				5’- GGACCTCTCGGTCTAGGAAATA-3’
sequence-based reagent	NA	ITS Forward Primer		29436367				5’- CTTGCGTGTTACGGTTGTTTC-3’
sequence-based reagent	NA	ITS Reverse Primer		29436367				5’- ACAGCATGGACTGCGATATG-3’
sequence-based reagent	NA	28S Forward Primer		29436367				5’-AGCCCGATGAACCTGAATATC-3’
sequence-based reagent	NA	28S Reverse Primer		29436367				5’- CATGCTCTTCTAGCCCATCTAC-3’
sequence-based reagent	NA	rDNA, DNA FISH		28007840				5' - AGTGAAAAATGTTGAAATATTCCCATATTCTCTAAG - 3' TATTATAGAGAAAAGCCATTTTAGTGAATGGA
sequence-based reagent	NA	359bp, DNA FISH		28007840				5' - CCACATTTTGCAAATTTTGATGACCCCCCTCCTTACAAAAAATGCG - 3'
sequence-based reagent	NA	TAGA, DNA FISH		28007840				5' - (TAGA)8 - 3'
sequence-based reagent	NA	AATAAAC, DNA FISH		28007840				5' - (AATAAAC)6 - 3'
sequence-based reagent	NA	AATAC, DNA FISH		28007840				5' - (AATAC)6 - 3'
sequence-based reagent	NA	AATAGAC, DNA FISH		28007840				5' - (AATAGAC)6 - 3'
software, algorithm	NA	ApE	ApE: A plasmid Editor, by M. Wayne Davis					http://jorgensen.biology.utah.edu/wayned/ape/
